# Supplementary material for: Reduced side effects and improved pain management by continuous ketorolac infusion with patient-controlled fentanyl injection compared with single fentanyl administration in pelviscopic gynecologic surgery: a randomized, double-blind, controlled study
Source: PubMed Central journal article supplement — Korean J Anesthesiol. 2023 Jun 14;77(1):77–84. doi: 10.4097/kja.23217 (PMC10834721; doi:10.4097/kja.23217), 2023-06-14
Supplement: kja-23217-Supplementary-Table-1.pdf [file kja-23217-Supplementary-Table-1.pdf]

**Supplementary Table 1.** Incidence of PONV

| Times (h) | Dual group (n = 35)         | Single group (n = 33)          | P value |
|-----------|-----------------------------|--------------------------------|---------|
| PACU      | 30/4/1/0 (85.7/11.4/2.9/0)  | 28/2/1/2 (84.8/6.1/3.0/6.1)    | 0.444   |
| 0–2       | 24/6/5/0 (68.6/17.1/14.3/0) | 18/8/5/2 (54.5/24.2/15.2/6.1)  | 0.378   |
| 2–6       | 30/3/2/0 (85.7/8.6/5.7/0)   | 17/5/6/5 (51.5/15.2/18.2/15.2) | 0.011   |
| 6–12*     | 29/6/0/0 (82.9/17.1/0/0)    | 15/5/3/5 (53.6/17.8/10.7/17.8) | 0.009   |
| 12–24†    | 33/0/0/0 (100/0/0/0)        | 15/0/0/0 (100/0/0/0)           | NA      |

Data are expressed as number (%) of none/nausea/retching/vomiting. NA: not available, PACU: post anesthesia care unit, PCA: patient-controlled analgesia. \*Five patients in the single group discontinued the intravenous PCA at postoperative 2–6 h. †Two patients in the dual group and 13 patients in the single group discontinued the intravenous PCA at postoperative 6–12 h.
